# Supplementary material for: The Four Canonical TPR Subunits of Human APC/C Form Related Homo-Dimeric Structures and Stack in Parallel to Form a TPR Suprahelix
Source: PubMed Central journal article supplement — J Mol Biol. 2013 Nov 15;425(22):4236–48. doi: 10.1016/j.jmb.2013.04.004 (PMC3898896; doi:10.1016/j.jmb.2013.04.004), 2013-11-15

## SUPPLEMENTARY MATERIAL

### SUPPLEMENTARY FIGURES

**Supplementary Figure 1.** Canonical TPR subunits of the APC/C are structurally related homo-dimers forming 14 contiguous TPR motifs. **(A)** Schematic of Cdc23 structure. **(B)** Multiple sequence alignment of Cdc23, Cdc27 and Apc7. Invariant and conserved residues are coloured red and yellow, respectively. Residues at the dimer interface of Cdc23 are shown with blue arrows. The corresponding cluster indicated in **Figure 2A** is indicated. Residues involved in the Apc7 crystal dimer are indicated with green circles <sup>36</sup>. Consensus TPR residues (8, 20 and 27) are indicated. Essential residues that define the two mutable domain of *S. cerevisiae* Cdc23 <sup>32</sup> are indicated with purple arrows within the N-terminal dimerisation domain, and TPR motifs 9-11 of the C-terminal domain. The *S. pombe* Nuc2 ts mutant <sup>52</sup> is indicated with a blue arrow. Figure produced using ALSRIPT <sup>51</sup>.

**Supplementary Figure 2.** Mapping residues of the N-terminal mutable domain of *S. cerevisiae* Cdc23 <sup>32</sup> onto the *S. pombe* Cut23/Cdc23 structure (in yellow).

**Supplementary Figure 3.** Comparison of the dimer interface of Cdc23<sup>Nterm</sup> with the crystal structure of Apc7 (167 residues, PDB:3FFL) <sup>36</sup>.

**Supplementary Figure 4.** Detection of twinning. Left, self-rotation function plot at  $\kappa=180^\circ$  for the native Cdc23<sup>Nterm</sup> crystal **(A)**, for an EMTS crystal soaked **(C)** and for SeMet labelled crystal **(E)**. Right, corresponding cumulative intensity difference plot

of the intensity difference of local pairs of intensities that are not twin-related  $|L|$  [ $L = [I(h1)-I(h2)]/[I(h1) + I(h2)]$ ] against the cumulative probability distribution  $N(L)$  of the parameter  $L$  <sup>53</sup>. The expected plots for untwinned (blue), twinned acentric data (green) and the calculated plots (red).

**Supplementary Figure 5.** Electron density maps calculated for SeMet data obtained from density modification followed by heavy atom SAD-phasing. Stereoview of the map with  $C\alpha$ -trace of the final model docked (left) and the electron density for TPR3 (right) shown for  $P4_3$  twinned-uncorrected (**A**) data,  $P4_3$  twinned-corrected data (**B**) and  $P1$  data with twin-corrections specific to  $P4$  applied (**C**).

#### ADDITIONAL SUPPLEMENTARY REFERENCES

52. Hirano, T., Hiraoka, Y. & Yanagida, M. (1988). A temperature-sensitive mutation of the *Schizosaccharomyces pombe* gene *nuc2+* that encodes a nuclear scaffold-like protein blocks spindle elongation in mitotic anaphase. *J Cell Biol* **106**, 1171-83.
53. Padilla, J. E. & Yeates, T. O. (2003). A statistic for local intensity differences: robustness to anisotropy and pseudo-centering and utility for detecting twinning. *Acta Crystallogr D Biol Crystallogr* **59**, 1124-30.
54. Davis, I. W., Leaver-Fay, A., Chen, V. B., Block, J. N., Kapral, G. J., Wang, X., Murray, L. W., Arendall, W. B., 3rd, Snoeyink, J., Richardson, J. S. & Richardson, D. C. (2007). MolProbity: all-atom contacts and structure validation for proteins and nucleic acids. *Nucleic Acids Res* **35**, W375-83.

**Table S1. Data collection and refinement statistics**

| <b>Data Collection Statistics</b>                 |                                  |                        |                        |                        |
|---------------------------------------------------|----------------------------------|------------------------|------------------------|------------------------|
|                                                   | Hg                               | Native                 | Se-Met-P1              | Se-Mer-P4              |
| Beam line                                         | ESRF ID29                        | ESRF ID14-4            | DLS I04                | DLS I04                |
| Space Group                                       | P4 <sub>3</sub> 2 <sub>1</sub> 2 | P4 <sub>3</sub>        | P1                     | P4 <sub>1</sub>        |
| <i>Unit Cell Parameters</i>                       |                                  |                        |                        |                        |
| <b>a</b> (Å)                                      | 56.8                             | 61.2                   | 60.3                   | 60.3                   |
| <b>b</b> (Å)                                      | 56.8                             | 61.2                   | 60.3                   | 60.3                   |
| <b>c</b> (Å)                                      | 154.8                            | 151.4                  | 151.6                  | 151.6                  |
| <b>α</b> (°)                                      | 90                               | 90                     | 90                     | 90                     |
| <b>β</b> (°)                                      | 90                               | 90                     | 90                     | 90                     |
| <b>γ</b> (°)                                      | 90                               | 90                     | 90                     | 90                     |
| Z                                                 | 1                                | 2                      | 8                      | 2                      |
| Resolution limits (Å)                             | 46-1.90<br>(2.0-1.90)            | 76-2.20<br>(2.32-2.20) | 28-3.20<br>(3.37-3.20) | 28-3.20<br>(3.37-3.20) |
| R <sub>merge</sub>                                | 0.114 (0.694)                    | 0.084 (0.522)          | 0.08 (0.740)           | 0.10 (0.584)           |
| I/σ (I)                                           | 18.8 (4.8)                       | 11.4 (2.2)             | 9.2 (1.9)              | 18.1(3.3)              |
| Total number unique                               | 20943 (2959)                     | 27871 (3834)           | 35156 (5121)           | 8971(1292)             |
| Completeness (%)                                  | 99.9 (99.6)                      | 98.6 (93.3)            | 99.7 (99.9)            | 99.9(100)              |
| Multiplicity                                      | 23.7 (18.8)                      | 4.5 (3.3)              | 6.0 (5.9)              | 23.5(23.5)             |
| Anomalous completeness (%)                        | 100.0 (99.7)                     | 95.5 (83.9)            | 97.4 (97.8)            | 99.9(100)              |
| Anomalous multiplicity                            | 12.9 (9.9)                       | 2.3 (1.6)              | 3.0 (3.0)              | 11.8(11.6)             |
| <b>Refinement Statistics</b>                      |                                  |                        |                        |                        |
| Resolution limits (Å)                             | 40-1.9                           | 57-2.2                 |                        |                        |
| <i>Number of reflections</i>                      |                                  |                        |                        |                        |
| Working set                                       | 38206 <sup>+</sup>               | 26415                  |                        |                        |
| Test set                                          | 1959 <sup>+</sup>                | 1408                   |                        |                        |
| R <sub>work</sub> /R <sub>free</sub>              | 0.1732/0.1995                    | 0.1512/0.1768          |                        |                        |
| <i>Number of atoms</i>                            |                                  |                        |                        |                        |
| Protein                                           | 2001                             | 3867                   |                        |                        |
| Ligand                                            | 76                               | 119                    |                        |                        |
| <i>Mean B-factors</i>                             |                                  |                        |                        |                        |
| Protein atoms (Å <sup>2</sup> )                   | 30.69                            | 39.56                  |                        |                        |
| Ligand atoms (Å <sup>2</sup> )                    | 39.12                            | 48.47                  |                        |                        |
| <i>RMSD from Ideal values</i>                     |                                  |                        |                        |                        |
| Bond length (Å)                                   | 0.007                            | 0.007                  |                        |                        |
| Bond angles (°)                                   | 0.925                            | 0.904                  |                        |                        |
| <i>Ramachandran plot Statistics</i> <sup>++</sup> |                                  |                        |                        |                        |
| Preferred (%)                                     | 98.74                            | 98.26                  |                        |                        |
| Allowed (%)                                       | 1.26                             | 1.74                   |                        |                        |
| PDB accession codes:                              | 3ZN3                             |                        |                        |                        |

+ Anomalous data

++ Ramachandran map definitions from Molprobability<sup>54</sup>

Values in parentheses are for the highest resolution shell.

# Supplementary Figure S1

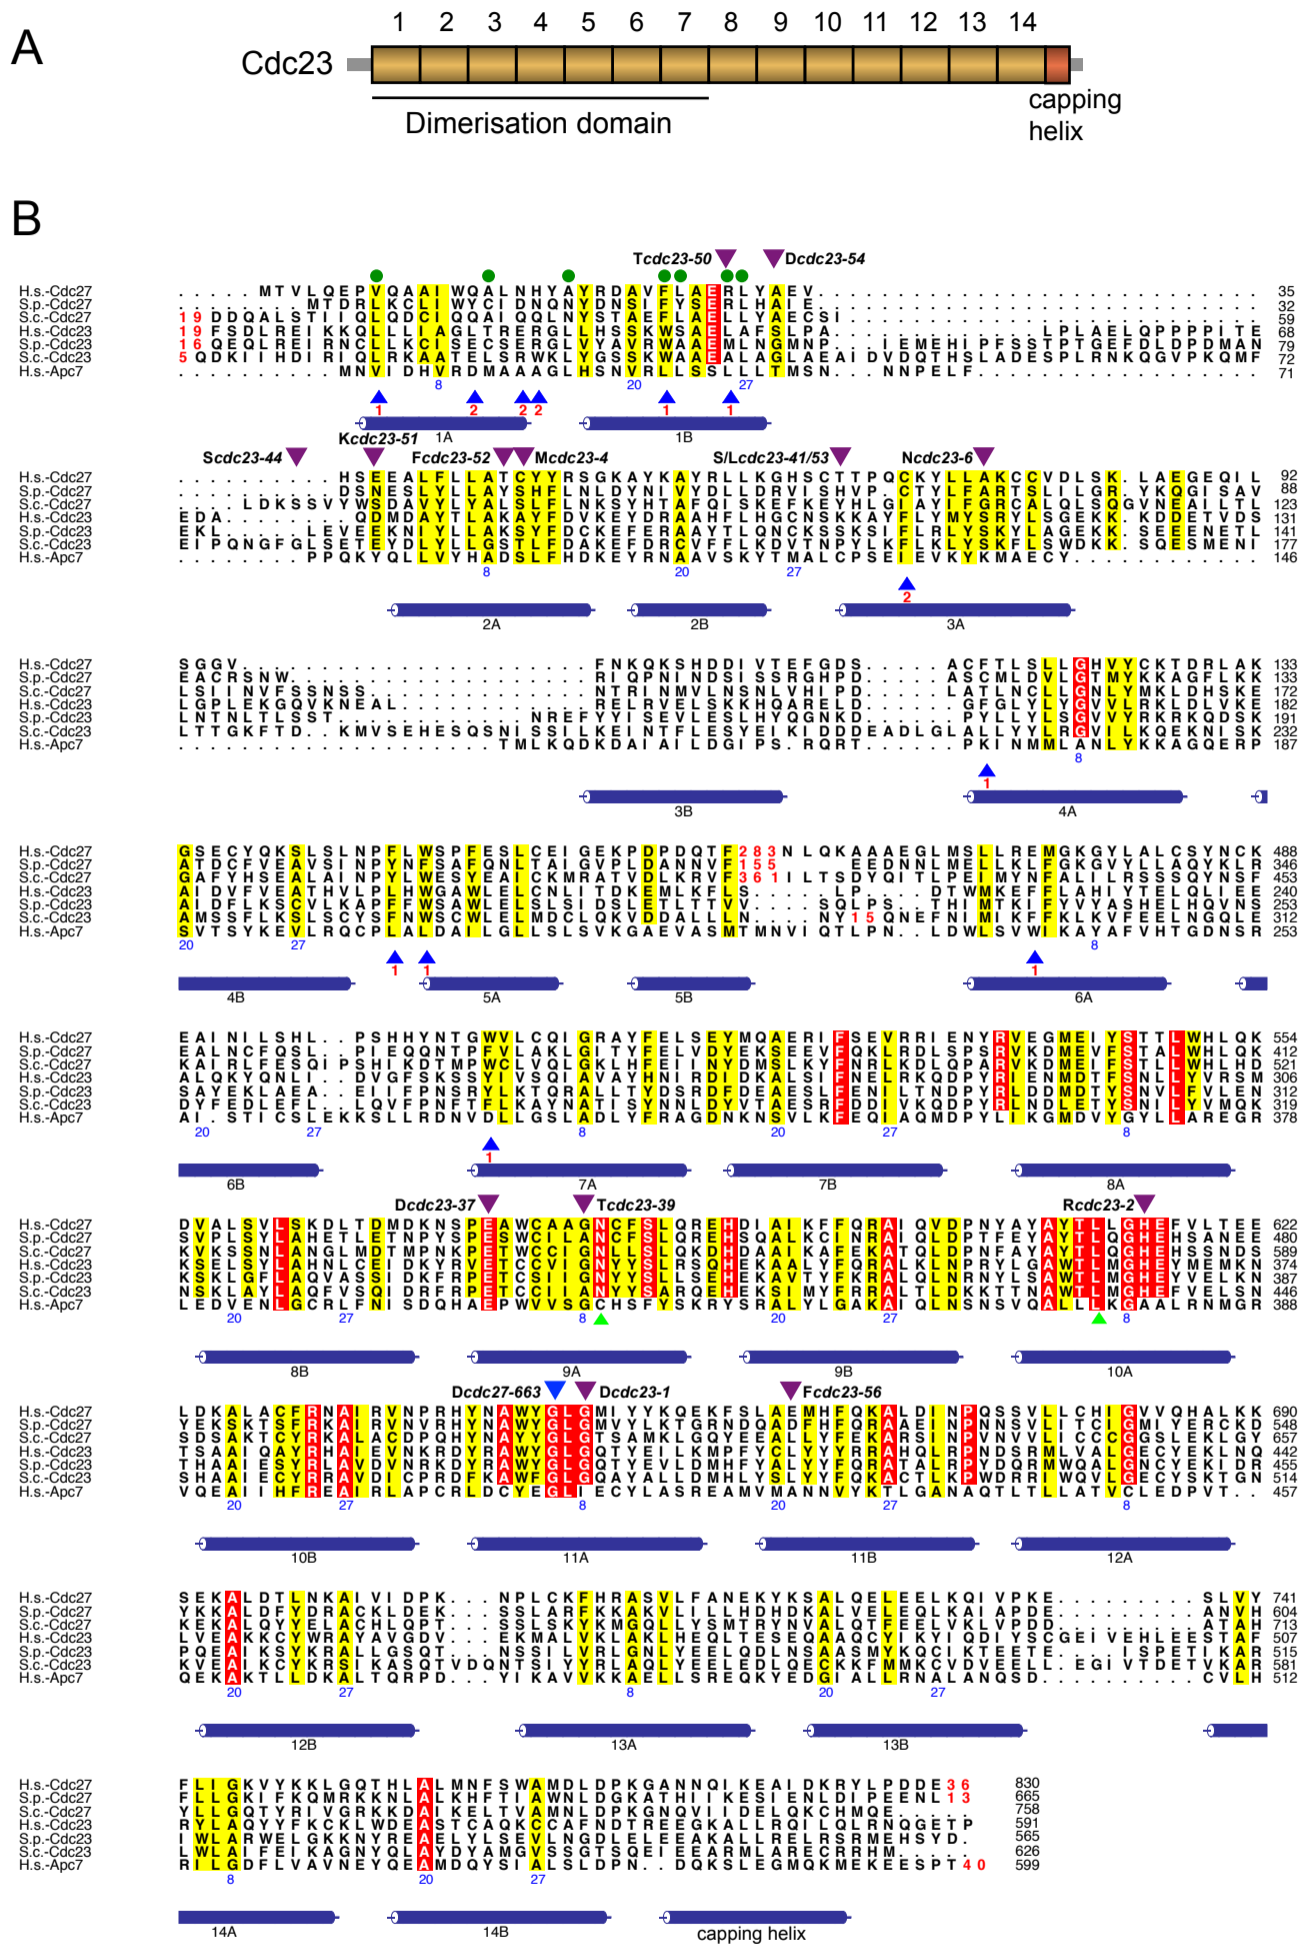

Supplementary Figure 2

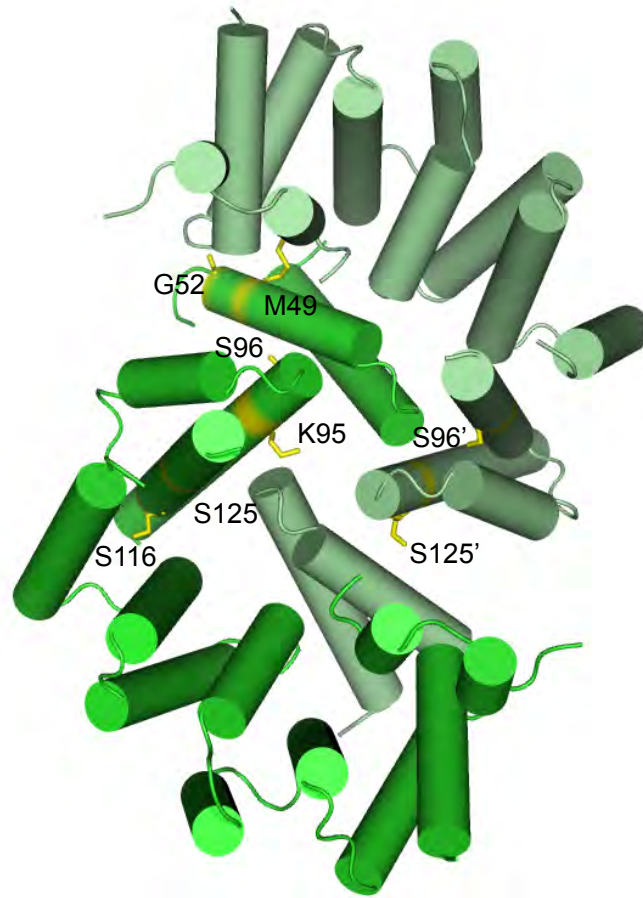

Supplementary Figure 3

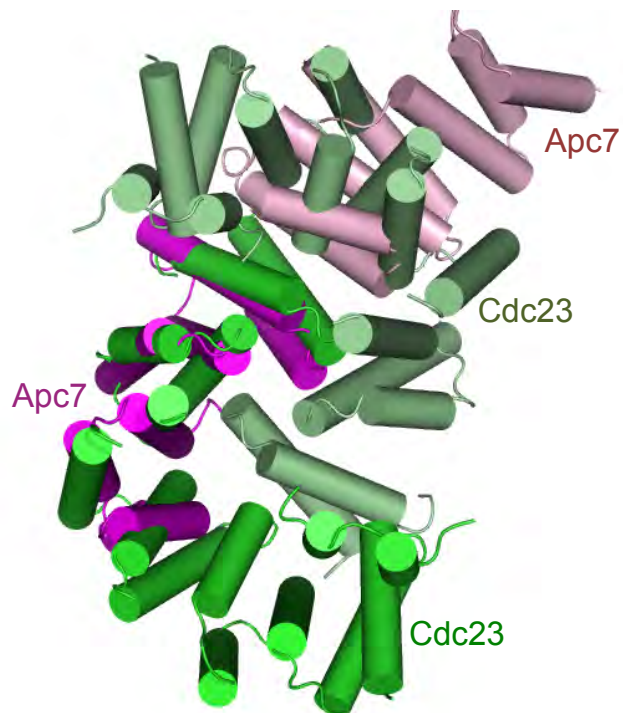

# Supplementary Figure 4

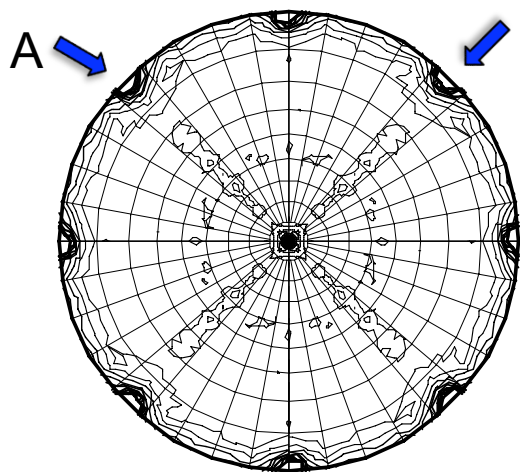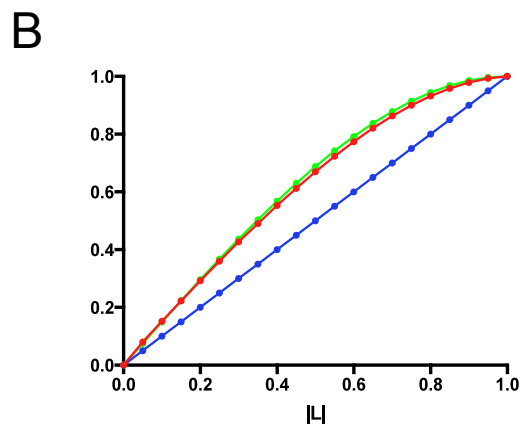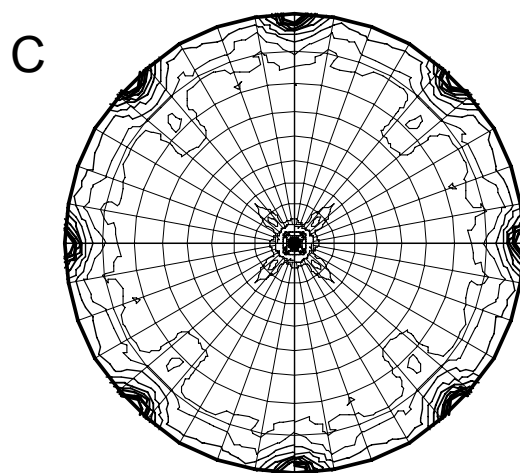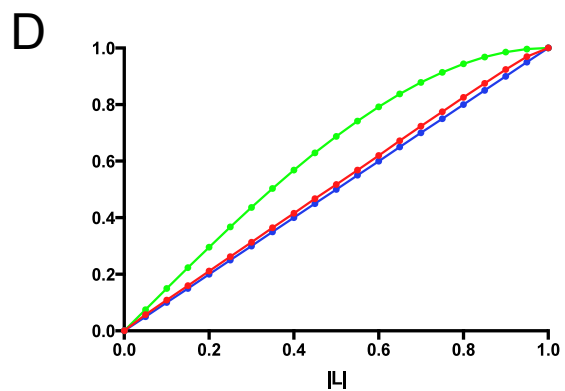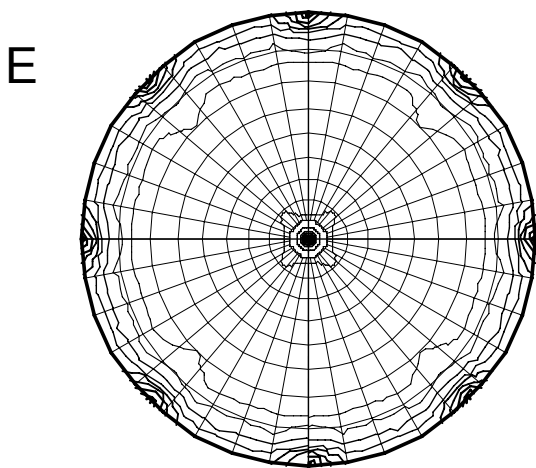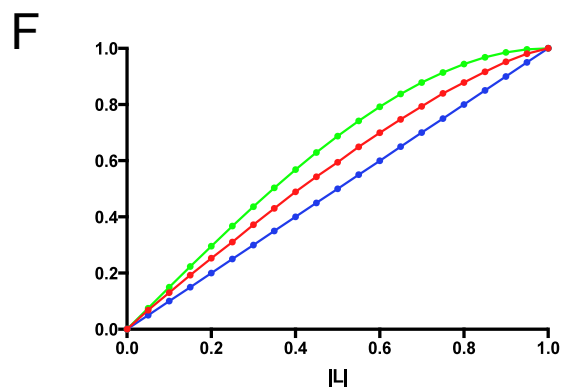

—●— Observed

—●— Expected-Untwinned

—●— Expected-twinned

# Supplementary Figure 5

A

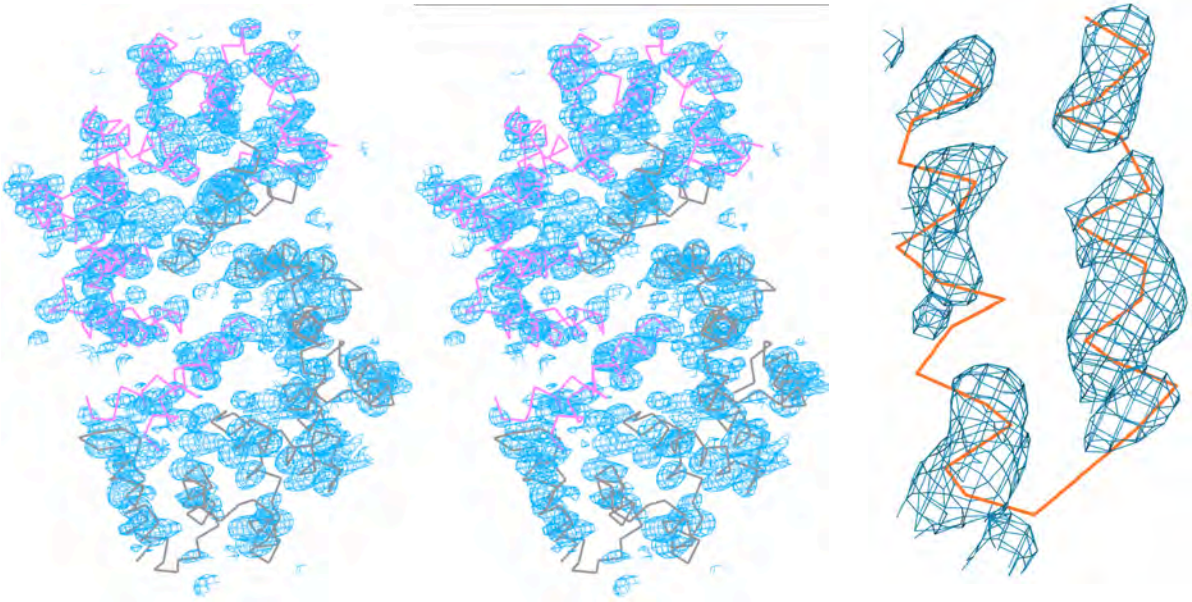

B

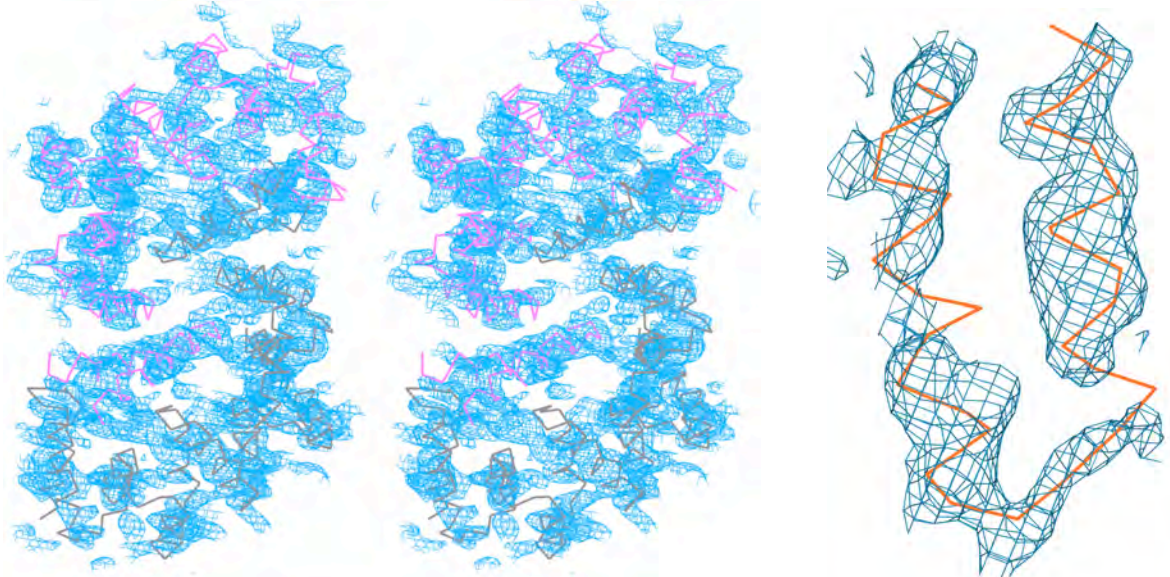

C

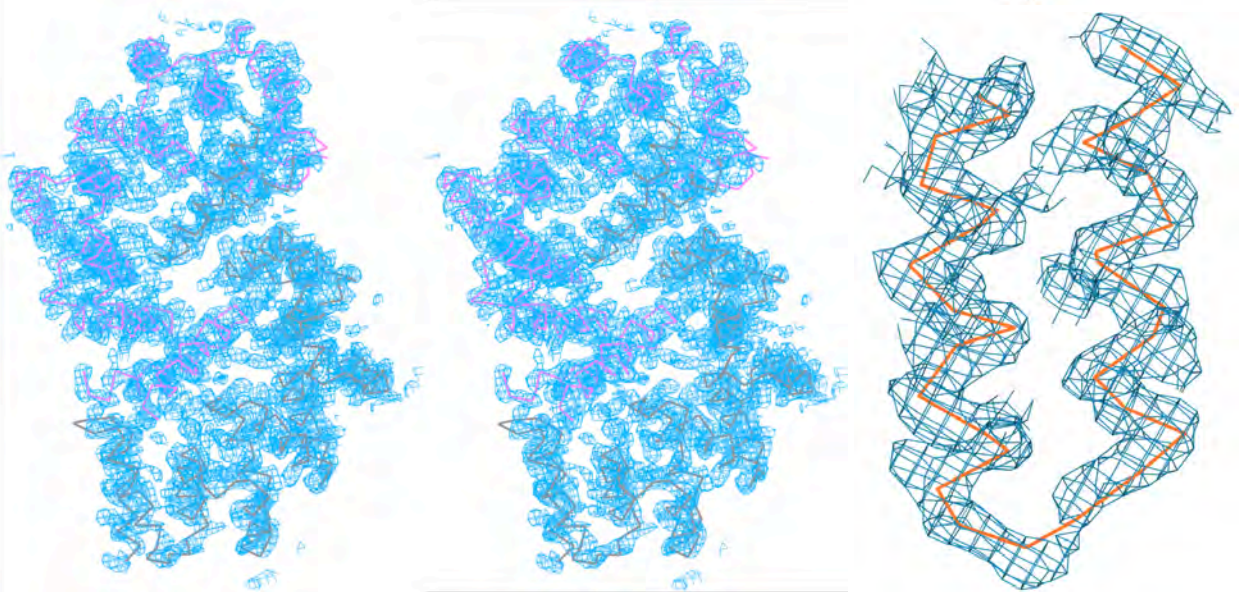

Supplement: mmc1.pdf [file mmc1.pdf]
